# Supplementary material for: 3D mesoporous structure assembled from monoclinic M-phase VO2 nanoflakes with enhanced thermochromic performance
Source: Royal Society of Chemistry journal article supplement (doi:10.1039/d1ra01558c), 2021-01-01
Supplement: d1ra01558c1.pdf [file d1ra01558c1.pdf]

## Supporting information:

### **3D mesoporous structure assembled by monoclinic M-phase VO<sub>2</sub> nanoflakes with enhanced thermochromic performance**

Liboro Hundito Molloro,<sup>a, b, \*</sup> Shouqin Tain,<sup>a</sup> Neway Belachew,<sup>b</sup> Kwadwo Asare Owusu,<sup>c</sup> Xiujian Zhao<sup>a,\*</sup>

<sup>a</sup>State Key Laboratory of Silicate Materials for Architectures, Wuhan University of Technology (WUT), No. 122, Luoshi Road, Wuhan 430070, P. R. China

<sup>b</sup>Department of Chemistry, Debre Berhan University, P.O.BOX 445, Debre Berhan, Ethiopia

<sup>c</sup>State Key Laboratory of Advanced Technology for Materials Synthesis and Processing, Wuhan University of Technology (WUT), No. 122, Luoshi Road, Wuhan 430070, P. R. China

\*Corresponding author. E-mail address: liborotg@yahoo.com

### S1. Synthesis procedure of monoclinic M-phase VO<sub>2</sub> nanorods

In a typical synthesis, 0.63 g (0.0034 mol) of vanadium pentoxide (V<sub>2</sub>O<sub>5</sub>) and 1.2859 g (0.0102 mol) of oxalic acid (H<sub>2</sub>C<sub>2</sub>O<sub>4</sub>·2H<sub>2</sub>O) were dissolved in 30 ml of deionized water. The suspension was stirred constantly in a water bath kettle at 80 °C until the color of the solution changed to blue. Then 30 ml of ethylene glycol was added to increase the viscosity of the solution. The solution was transferred to a 100 ml Teflon-lined stainless-steel autoclave. The autoclave was maintained at a temperature of 180 °C for 20 h and then cooled to room temperature naturally. The obtained black product was washed with water and ethanol, and then dried in air at 80 °C for 24 h to obtain monoclinic M-phase VO<sub>2</sub> nanorods.

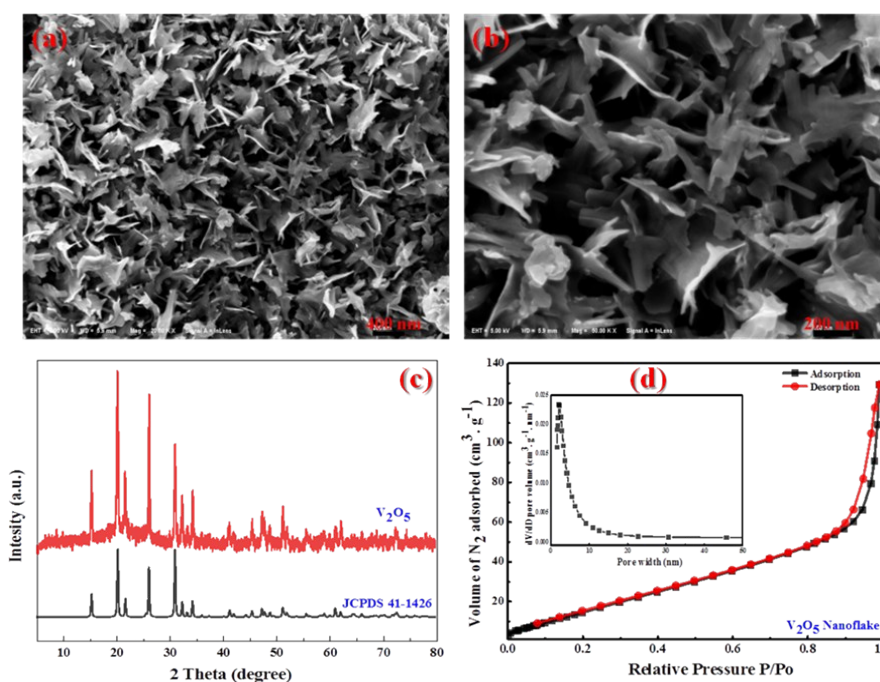

**Fig. S1.** 3D mesoporous structure assembled by V<sub>2</sub>O<sub>5</sub> nanoflakes (a) SEM images low and (b) high magnification, (c) XRD patterns of V<sub>2</sub>O<sub>5</sub> (JCPDS: 41-1426) and (d) Pore size distribution curves (the inset) and N<sub>2</sub> adsorption-desorption curves produced after calcinations of the adsorbed fiber at 450 °C in the presence of air to remove the EF template (initially prepared at the hydrothermal reaction temperature of 180 °C).

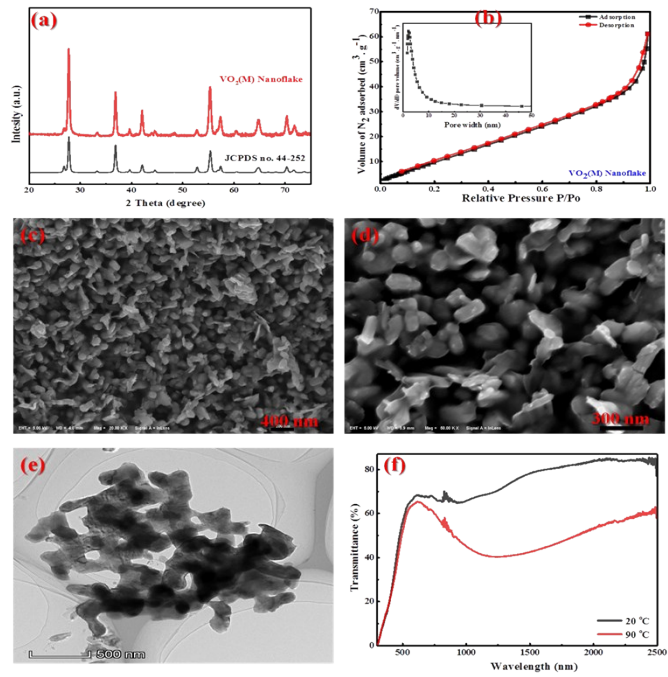

**Fig. S2.** 3D mesoporous structure assembled by M-phase VO<sub>2</sub> nanoflakes (a) XRD patterns, (b) Pore size distribution curves (the inset ) and N<sub>2</sub> adsorption-desorption curves, (c) SEM images low and (d) high magnification, (e) TEM image and (f) Transmittance spectra of films at 20 °C and 90 °C (prepared at the hydrothermal reaction temperature of 200 °C)
